# Supplementary material for: Profiling the MAPK/ERK dependent and independent activity regulated transcriptional programs in the murine hippocampus in vivo
Source: PubMed Central journal article supplement (PMC5368636; doi:10.1038/srep45101), 2017-03-28
Supplement: srep45101-s1.pdf [file srep45101-s1.pdf]

# Profiling the MAPK/ERK dependent and independent activity regulated transcriptional programs in the murine hippocampus in vivo

Nils Blüthgen, Mirjam van Bentum, Barbara Merz, Dietmar Kuhl, Guido Hermeij

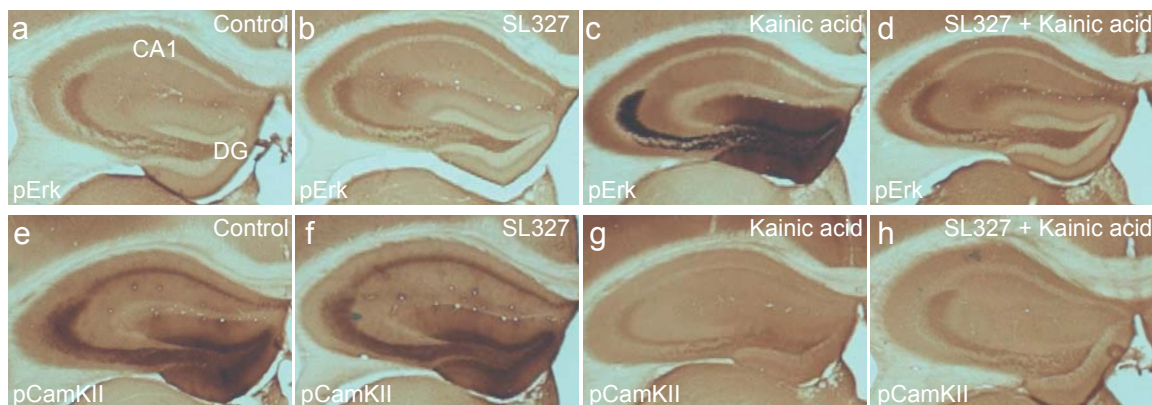

## Supplemental Figure 1. The MEK inhibitor SL327 blocks seizure induced ERK phosphorylation but has no effect on autophosphorylation of CaMKII.

The inhibitory domain of the Calcium/calmodulin-dependent protein kinase II (CaMKII) is within the same polypeptide. Autophosphorylation of Thr286 occurs as an inter-subunit reaction and modulates CaMKII kinase activity<sup>1</sup>. Previous studies demonstrated that seizures cause a dramatic loss of CaMKII Thr286 phosphorylation<sup>2</sup>. Parallel coronal mouse brain sections were immunostained for p-ERK (a-d) or for p-CaMKII (Thr286) (e-h). Mice were treated with vehicle (a, e); with SL327 for 90 minutes (b, f); treated with kainic acid and sacrificed 15 minutes after onset of seizures (c, g); or treated with SL327 60 minutes before intraperitoneal kainic acid injections and sacrificed 15 minutes after onset of seizures. The monoclonal p-CaMKII antibody recognizes endogenous CaMKII- $\alpha$  only when phosphorylated at Thr286 and CaMKII- $\beta$ , and CaMKII- $\gamma$  only when phosphorylated at Thr287. Note that SL327 treatment does not alter the level of CaMKII autophosphorylation at Thr287. CA1, field CA1 of the hippocampus; DG, dentate gyrus.

## Supplemental references

- 1 Lisman, J., Schulman, H. & Cline, H. The molecular basis of CaMKII function in synaptic and behavioural memory. *Nat Rev Neuroscience* 3, 175-190, doi:10.1038/nrn753 (2002)
- 2 Dong, Y. & Rosenberg, H.C. Brief seizure activity alters Ca<sup>2+</sup>/calmodulin dependent protein kinase II dephosphorylation and subcellular distribution in rat brain for several hours. *Neurosci Lett* 357, 95-98, doi:10.1016/j.neulet.2003.11.069 (2004)
